# Supplementary material
Source: PubMed Central journal article supplement (PMC2799741)
Supplement: 0911967106_0911967106SI.pdf [file 0911967106_0911967106SI.pdf]

# Supporting Information

Parry et al. 10.1073/pnas.0911967106

## SI Materials and Methods

**Plant Growth Assays.** Seeds were plated onto media containing  $1/2 \times$  MS media, 1% sucrose, 1% agar, and stratified for 2–4 days before growth at 22 °C under continuous light at  $100 \mu\text{mol m}^{-2}\text{s}^{-1}$ . For auxin growth assays, 4-day-old seedlings were transferred onto fresh MS media  $\pm$  auxin for an additional 4 days after which the length of roots after transfer was measured. Growth is expressed as a percentage of growth of the equivalent genotype on media without auxin. Lateral root assays were performed in a similar manner except the number of emerged lateral roots and primary root length was measured after an additional 9 days. Emerged lateral roots were counted using a Nikon SMZ1500 stereomicroscope. Mutant alleles have been previously described or isolated from the SALK T-DNA insertion collection: *tir1-1* (1), *tir1-10* (Salk\_090445), *afb1-3* (2), *afb1-5* (Salk\_144884), *afb2-3* (2), *afb3-4* (Salk\_068787).

**Generation of Transgenic Lines.** Promoter fusion lines were previously described (3). The TIR1/AFB1 translational GUS fusion lines were created by amplifying the cDNAs regions of each gene and placing them downstream of the appropriate promoter region in the pBluescript plasmid. The promoter-cDNA clones were PCR amplifying and cloned into the pENTr vector (Invitrogen) and subsequently by LR Clonase reaction into the destination vector pMDC163 (4). The primer sequences used are as follows:

TIR1 promotor (–14 bp to –1,979 bp), TIR1pSalF- (aaagtcgacgagtacgaaccgagactagg), TIR1pEcoR- (aaagatatccctcgatctcgatgatcg).

TIR1 cDNA (+1 to +1,783), TIR1EcoF- (aaagaattcatgcaagaagcgaatagcctgt), TIR1BamR- (aaagatcctaattcgtctgtagtagta).

AFB1 Promotor (–6 bp to –1,805 bp), AFB1pSalF- (aaagtcgacgataagaagatgggcacgt), AFB1pEco- (aaagatatccagaacagagtgagagag).

AFB1 cDNA (+1 to +1,758), AFB1EcoF- (aaagaattcatgggtctccgattccacct), AFB1BamR- (aaagatcccttatggctagatgtgaaact).

AFB2 promotor (–3 to –1,849), AFB2pSalF- (aaagtcgacccgacgtttcaagtgttca), AFB2pEcoR- (aaagatatcctaattcaccagcaagattc).

AFB2 cDNA (+1 to +1,725), AFB2EcoF- (aaagaattcatgaattttccagatgaagt), AFB2BamR- (aaagatccgagaatccacacaatggcg).

AFB3 Promotor (–3 bp to –1,655), AFB3pSalF- (aaagtcgacgtgggtctattattaggt), AFB3pClaR- (aaaatcgattctctattgattgtgaac).

AFB3 cDNA (+1 to +1,734), AFB3BamF- (aaagaattcatgaattttccagacagagg), AFB3NotR- (aaagcgccgcctaagaatcctaactatg).

We also created a new TIR1 transcriptional GUS fusion line in pMDC163 using the primers described above.

The generation of *pmiR393a-GFP* and *pmiR393b-GFP* transgenic lines were previously described (5). Confocal images of GFP expression were obtained using a Leica TCS SP confocal microscope. To visualize the cell walls, roots were stained for 1 min in  $1 \mu\text{g/mL}$  propidium iodide (in water), washed briefly, and mounted in water.

We amplified the promoter regions of *miR393a* (–70 bp to –2,578 bp) and *miR393b* (–87 bp to –2,532 bp) genes into pMDC163 as described above. Primer sequences are as follows: *miR393apromF*- aactgcaagttaagtgggc, *miR393aR*- ttgtcaatg-

gacgtgttcc, *miR393bpromF*- ttgtgatgatgacacaaagg, and *miR393bpromR*- agatgaccatgatcctcttc.

The *35S:miR393a* line has been previously described (5). To create the *35S:miR393b* clone we amplified the region surrounding the *miR393b* mature gene (–273 bp to +218 bp) and cloned it into the pENTr vector and subsequently into the pMDC32 destination vector (4).

We transformed each destination binary vector into electrocompetent *Agrobacterium* strain GV3101 and then transformed *Arabidopsis* by floral dip. Selection of transgenic seedlings was performed by growth on hygromycin-containing plates ( $30 \mu\text{g/mL}$ ).

**Glucuronidase Assay.** X-Gluc assays were performed by incubating seedlings in X-Gluc buffer (50 mM sodium phosphate buffer pH 7, 0.1% Triton X-100, 1 mM 5-bromo-4-chloro-3-indolyl- $\beta$ -D-glucuronide (GBT) overnight at 37 °C. Seedlings were cleared by ethanol series (70%, 50%, 30%, and 10%) and mounted in 50% glycerol or choral hydrate for microscopy. Bright-field images were taken using Nikon SMZ1500 and Nikon E800 microscopes.

**RNA Techniques.**  $\text{N}_2$ -frozen tissue was ground up using mortar and pestle and RNA was extracted either using QIAGEN RNeasy plant kit or using Tri-reagent (Sigma). For semiquantitative RT-PCR poly(dT) was performed on 1–5  $\mu\text{g}$  RNA using SuperScript II (Invitrogen). PCR was subsequently performed by standard techniques with Ex-Taq (Takara). Northern blots were undertaken using standard techniques. DNA probes were amplified using the following primers: GUSprobeF- atgttacctctgtagaaacc, GUSprobeR- cgaaacgcagcagcatagc, TIR13utrF- ggatataagacaaagaac, TIR13utrR- aacaaagctctcttagatc. Standard techniques for random priming were used to label DNA probes with  $[^{32}\text{P}]$ .

**Quantitative PCR.** Plants were grown on  $1/2$  MS, 1% bactoagar at 23 °C,  $150 \mu\text{mol m}^{-2}\text{s}^{-1}$  under continuous light. Six-day-old plants were transferred on medium supplemented with  $-/+1 \mu\text{M}$  of IAA for 6 h. RNA was extracted from roots using Qiagen RNeasy plant mini kit with on-column DNase treatment (RNase free DNase set, Qiagen). Poly(dT) cDNA was prepared from 3  $\mu\text{g}$  total RNA using the transcript first strand cDNA synthesis kit (Roche). Quantitative PCR was performed using SYBR Green Sensimix (Quantace) on a Stratagene Mx3005P apparatus. PCR was carried out in 96-well optical reaction plates heated for 5 min to 95 °C, followed by 40 cycles of denaturation for 10 s at 95 °C and annealing-extension for 30 s at 60 °C. Target quantifications were performed with the following primer pairs that lie 5' of the *miR393* recognition site in each gene: TIR1F- cctaataatgcagcgcctct, TIR1R- ggttgaagcaagcacctca, AFB1F- actgatgtgatcgtctctattg, AFB1R- agttgaactctctgaaaatagctaag, AFB2F- cgtgcctcgaaggagaaac, AFB2R- ttgtgagacctagcaacagc, AFB3F- tgataaactttacctctaccgaacag, and AFB3R- cctaacatattgtgtgcatctt. Expression levels were normalized to UBA (At1g04850) using the following primers: UBAF- agtggagaggtgcagaaga and UBAR- ctccggtagcagagcttta. All qRT-PCR experiments were performed in triplicates and the values presented represent means  $\pm$  SE.

**In Vitro Protein Expression and Pulldown Reactions.** The cDNAs of *TIR1*, *AFB1*, *AFB2*, and *AFB3* were amplified and cloned into pTNT (Promega) using an EcoRI and BamHI restriction sites. *Aux/LAA* cDNAs were amplified and cloned into pGEX-4T3



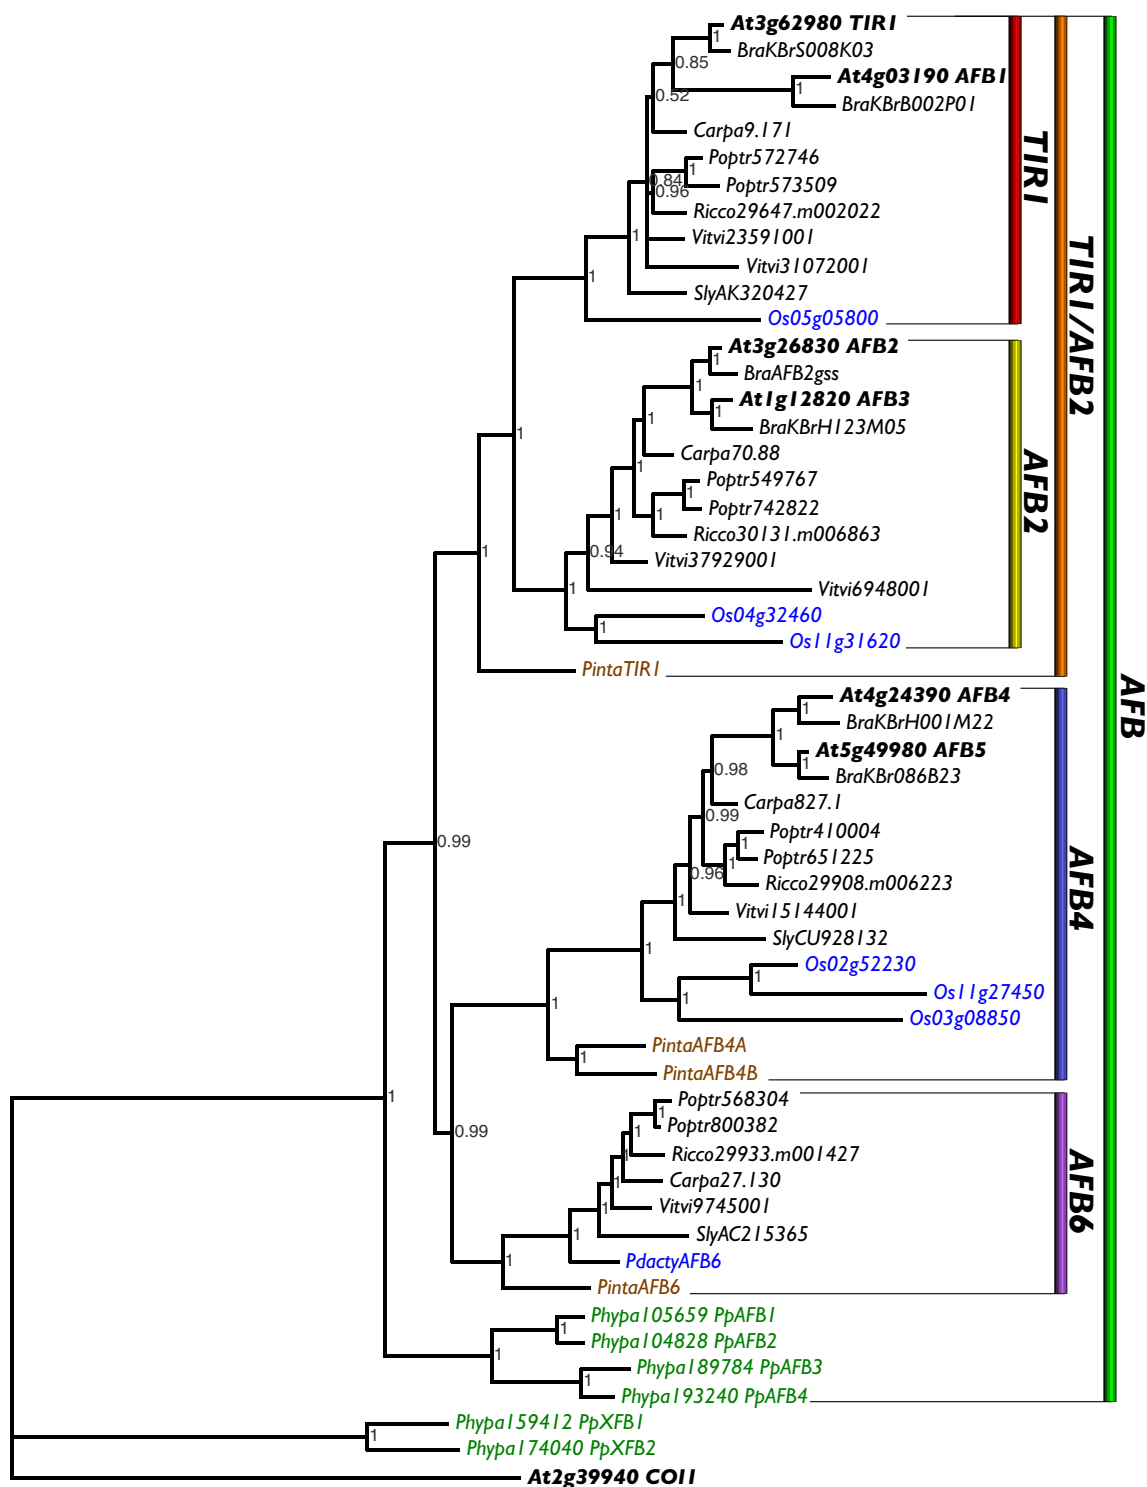

**Fig. S1.** *TIR1/AFB* genes radiated during vascular plant evolution. The phylogeny of *TIR1/AFB* genes was inferred using Bayesian methods and an alignment of full-length *TIR1/AFB* protein sequences. The colors of protein names indicate the phylogenetic affinities of the plant whose genome encodes the protein: black, eudicot; blue, monocot; brown, gymnosperm; and green, moss (*Inset*). Numbers at nodes indicate posterior probabilities. Distinct clades of *TIR1/AFB* genes are designated to the *Right*. The tree was rooted using the *Arabidopsis* COI1 protein and moss members of a family F-box proteins (XFB) absent in seed plants. Abbreviations: At, *Arabidopsis thaliana*; Bra, *Brassica rapa*; Carpa, *Carica papaya*; Poptr, *Populus trichocarpa*; Ricco, *Ricinus communis*; Vitvi, *Vitis vinifera*; Sly, *Solanum lycopersicum*; Os, *Oryza sativa*; Pdacty, *Phoenix dactylifera*; Pinta, *Pinus taeda*; and Phypa, *Physcomitrella patens*.

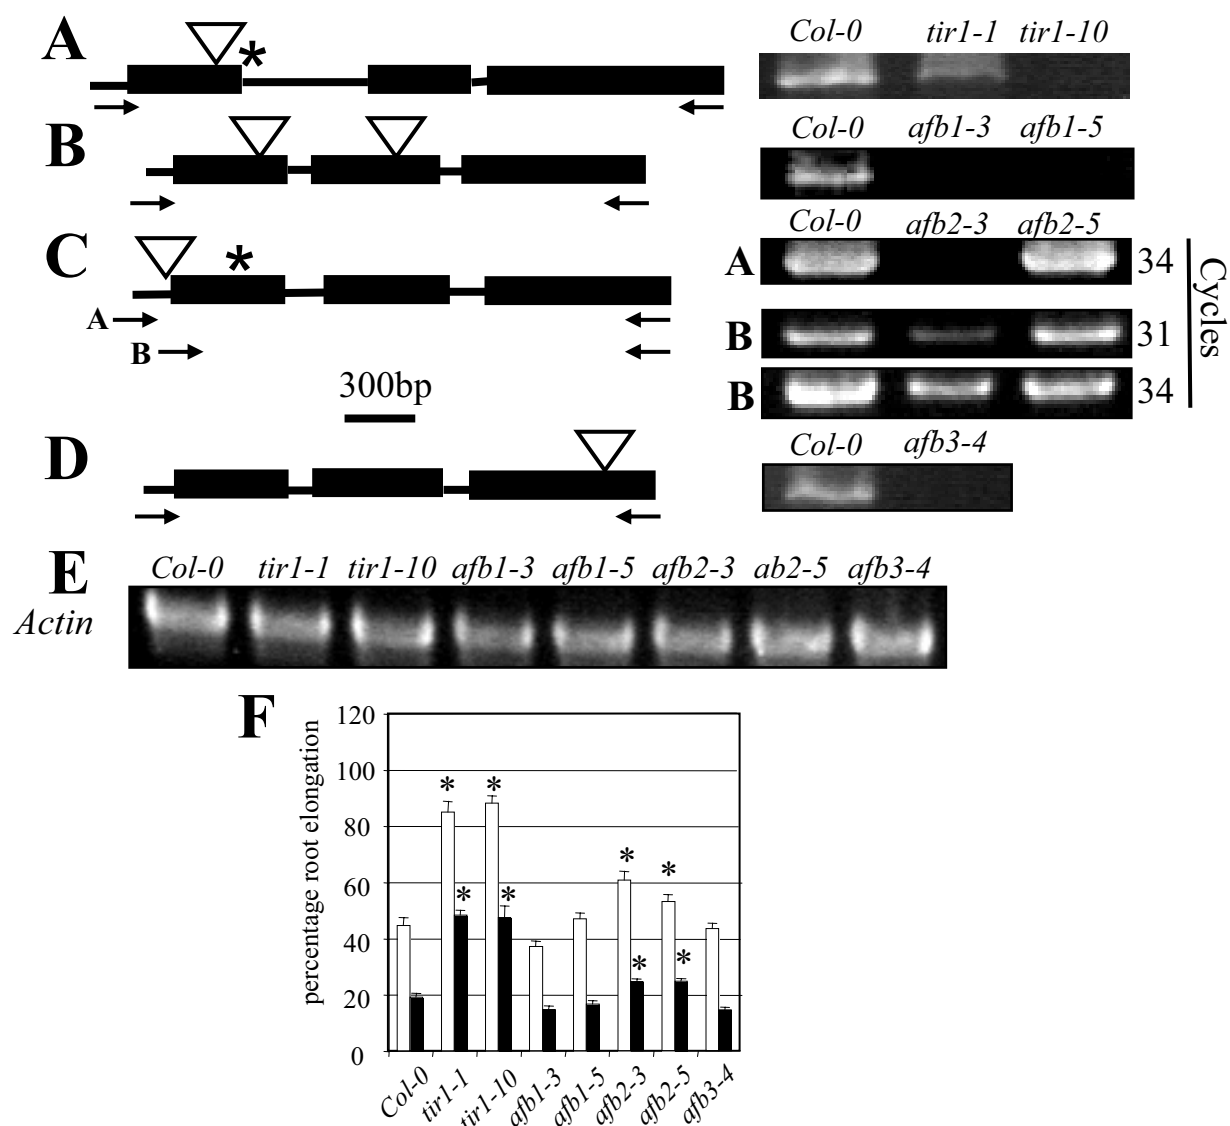

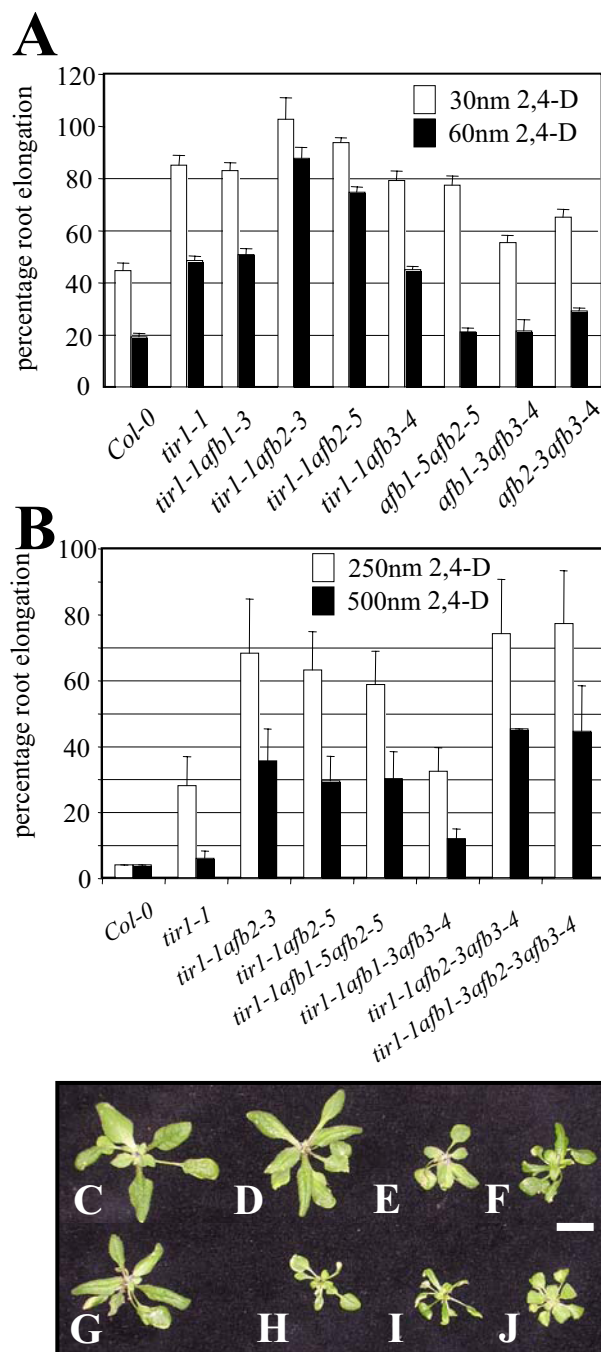

**Fig. S3.** Role of the TIR1/AFB genes in auxin response. (A) Four-day-old seedlings grown on MS media were transferred to media containing 2,4-D. Root elongation was measured after an additional 4 days and expressed as a proportion of growth in the absence of auxin. (Scale bars, SE.) (B) Experiment conducted as in 1A except that seedlings were transferred to media containing 2,4-D. (C–J) Rosettes of 30-day-old plants. Col-0 (C), tir1-1 (D), tir1-1afb2-3 (E), tir1-1afb2-5 (F), tir1-1afb1-3afb3-4 (G), tir1-1afb1-5afb2-5 (H), tir1-1afb2-3afb3-4 (I), and tir1-1afb1-3afb2-3afb3-4 (J). (Scale bar, 1 cm.)

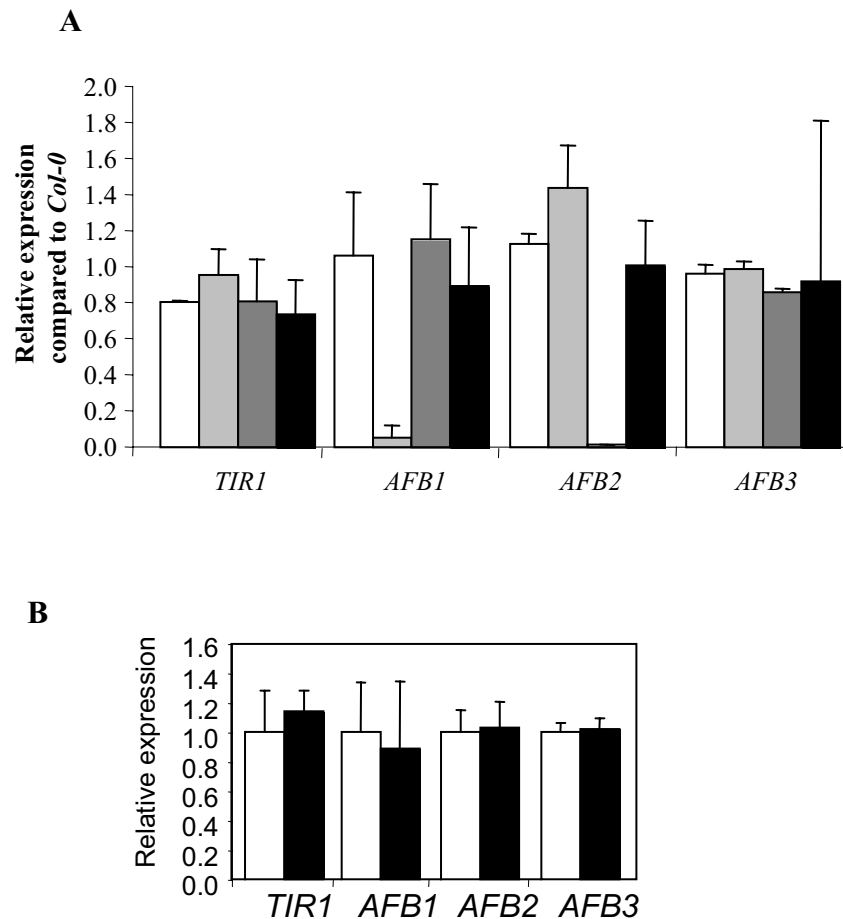

**Fig. 54.** Expression of *AFB* genes. (A) RNA was extracted from roots of *tir1-1* (white), *afb1-3* (light gray), *afb2-3* (dark gray), or *afb3-4* (black) seedlings. Primers corresponding to *TIR1*, *AFB1*, *AFB2*, or *AFB3* were used to perform qPCR and values are expressed relative to the expression in *Col-0* roots. (Scale bars, SD.) (B) RNA was extracted from roots of *Col-0* seedlings grown in the absence (white bars) or presence (black bars) of 1  $\mu$ M IAA. Primers corresponding to *TIR1*, *AFB1*, *AFB2*, or *AFB3* were used to perform qPCR. Values are relative to the expression in the absence of IAA. (Scale bars, SD.)

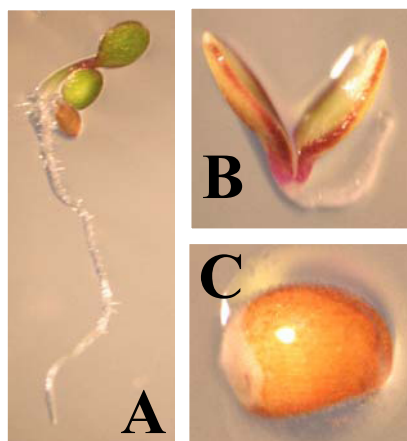

| <b>D</b> Genotype               | <b>A</b> | <b>B</b> | <b>C</b> | <b>n</b> |
|---------------------------------|----------|----------|----------|----------|
| <i>tir1-1afb1-5afb2-5</i>       | 100%     | -        | -        | >200     |
| <i>tir1-1afb1-3afb3-4</i>       | 100%     | -        | -        | >200     |
| <i>tir1-1afb2-3afb3-4</i>       | 37%      | 32%      | 31%      | 169      |
| <i>tir1-1afb1-3afb2-3afb3-4</i> | 10%      | 48%      | 42%      | 58       |

**Fig. S5.** Seedling phenotypes of higher order *tir1/afb* mutant seedlings. (A–C) Appearance of mutant seedlings. Representative seedlings are shown that form a root (A), are rootless (B), or do not germinate (C). (D) Table showing the proportions of each seedling type for each genotype.

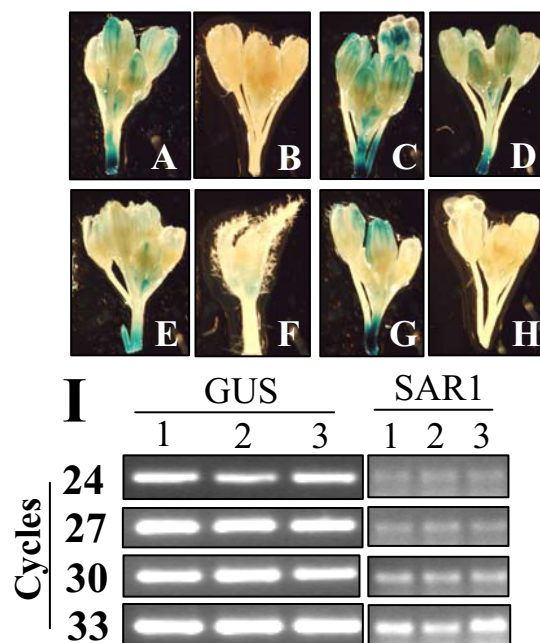

**Fig. S6.** *TIR1/AFB* gene expression involves posttranscriptional regulation. (A-H) GUS expression of flower buds in plants containing *pTIR1:GUS* (A) *pTIR1:cTIR1:GUS* (B), *pAFB1:GUS* (C), *pAFB1:cAFB1:GUS* (D), *pAFB2:GUS* (E), *pAFB2:cAFB2:GUS* (F), *pAFB3:GUS* (G), and *pAFB3:cAFB3:GUS* (H) transgenes. (I) RT-PCR performed on RNA extracted from flowers of plants containing *pTIR1:GUS* (1), *pTIR1:cTIR1:GUS* line 2-2 (2), or *pTIR1:cTIR1:GUS* line 24-4 (3). Primers were used to amplify from the coding regions of the transgenic GUS gene and the endogenous SAR1 gene (40). The PCR reactions were set up identically and run for 24, 27, 30, or 33 cycles.

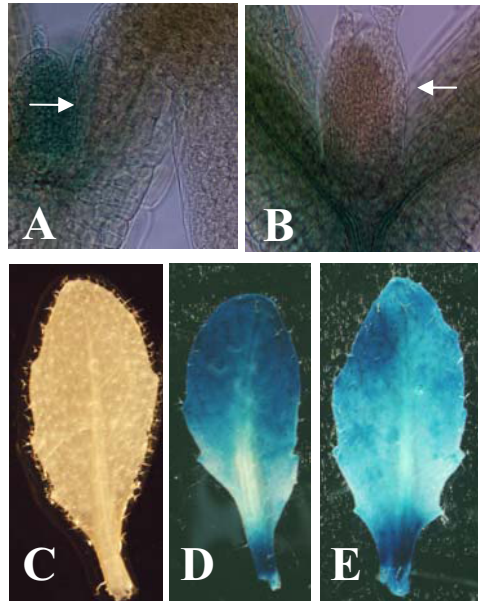

**Fig. S7.** Expression of *miR393* in leaves. (A and C) Expression of *pTIR1:cTIR1:GUS* in young (A) and older (C) leaves. (B and D) Expression of *pmir393a:GUS* in young (B) or older (D) leaves. (E) Expression of *pmir393b:GUS* in older leaf.

**A** *TIR1* GAG ACA AUG CGA UCC CUU UGG AUG 3'

*TIR1mi* GAA ACG AUG CGG UCG CUG UGG AUG 3'

*miR393a/b* CU AGU UAC GCU AGG GAA ACC U 5'

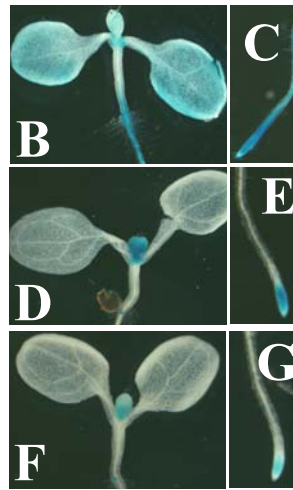

**H** *AFB1* GAG ACG AUG CGA UCC CUU UGG AUG 3'

*AFB1<sup>+</sup>* GAA ACA AUG CGA UCC CUU UGG AUG 3'

*miR393a/b* CU AGU UAC GCU AGG GAA ACC U 5'

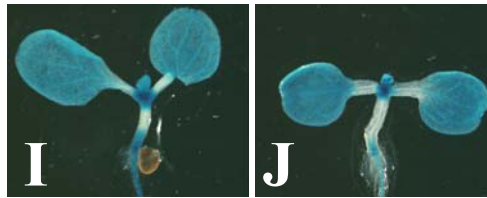

**Fig. S8.** MicroRNA-resistant forms of *TIR1:GUS* do not exhibit altered expression pattern. (A) *miR393* recognition sequences in *TIR1* and *TIR1mi*. Mutated nucleotides in *TIR1mi* are shown in red and mismatches with *miR393* are designated by ·. (B–G) Expression of *pTIR1:GUS* (B and C), *pTIR1:cTIR1:GUS* (D and E), and *pTIR1:cTIR1mi:GUS* (F and G) in 7-day-old seedlings showing that the mutated nucleotides have no effect on the expression pattern of *TIR1:GUS*. (H) *miR393* recognition sequences in *AFB1* and *AFB1<sup>TIR1</sup>*. The mutated nucleotide in *AFB1<sup>TIR1</sup>* is shown in red. (I and J) Expression of *pAFB1:cAFB1:GUS* (I) and *pAFB1:cAFB1<sup>TIR1</sup>:GUS* (J) in 7-day-old seedlings.
